# Supplementary material
Source: PubMed Central journal article supplement (PMC3591997)
Supplement: JB.01558-12_zjb999092459so1.pdf [file JB.01558-12_zjb999092459so1.pdf]

FIG S1

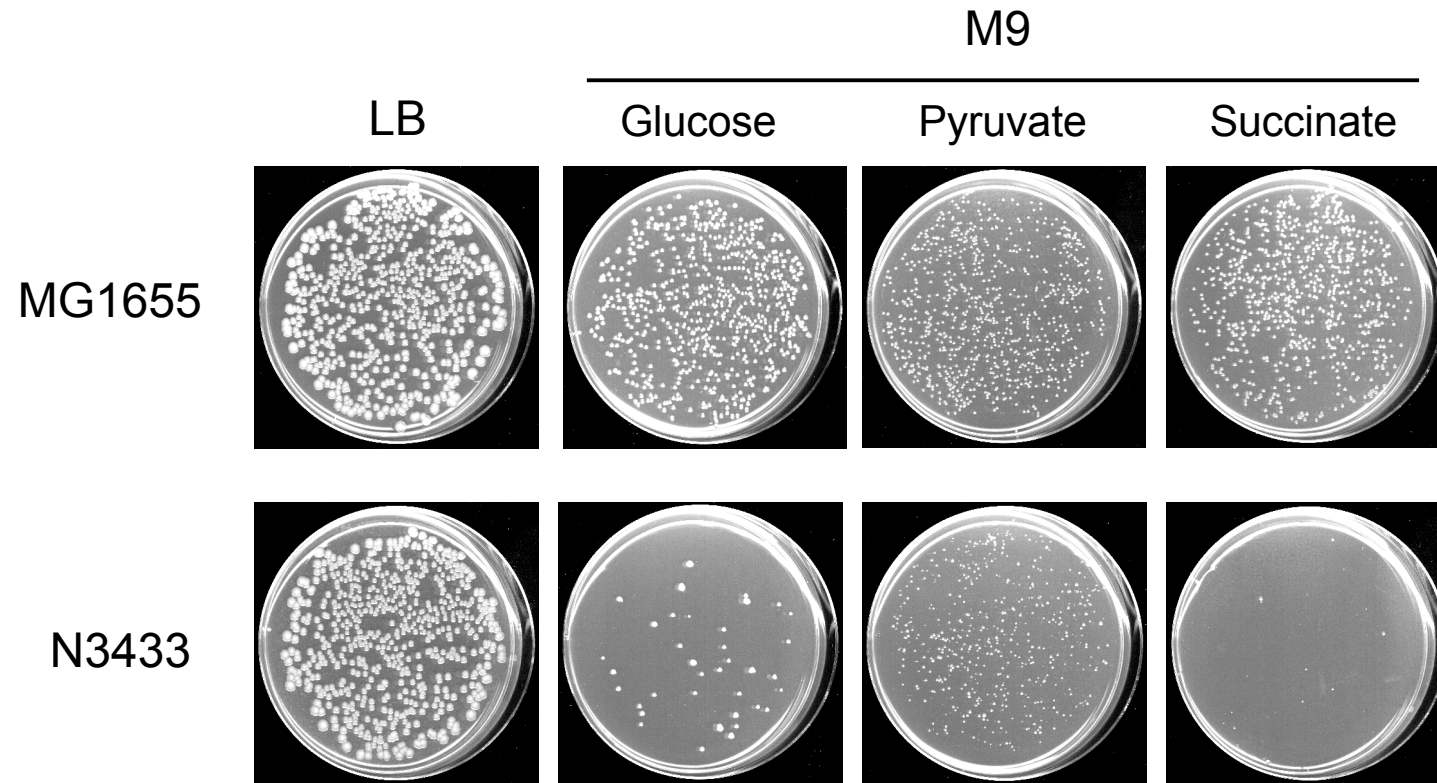

FIG S2

MG165D strain

M9

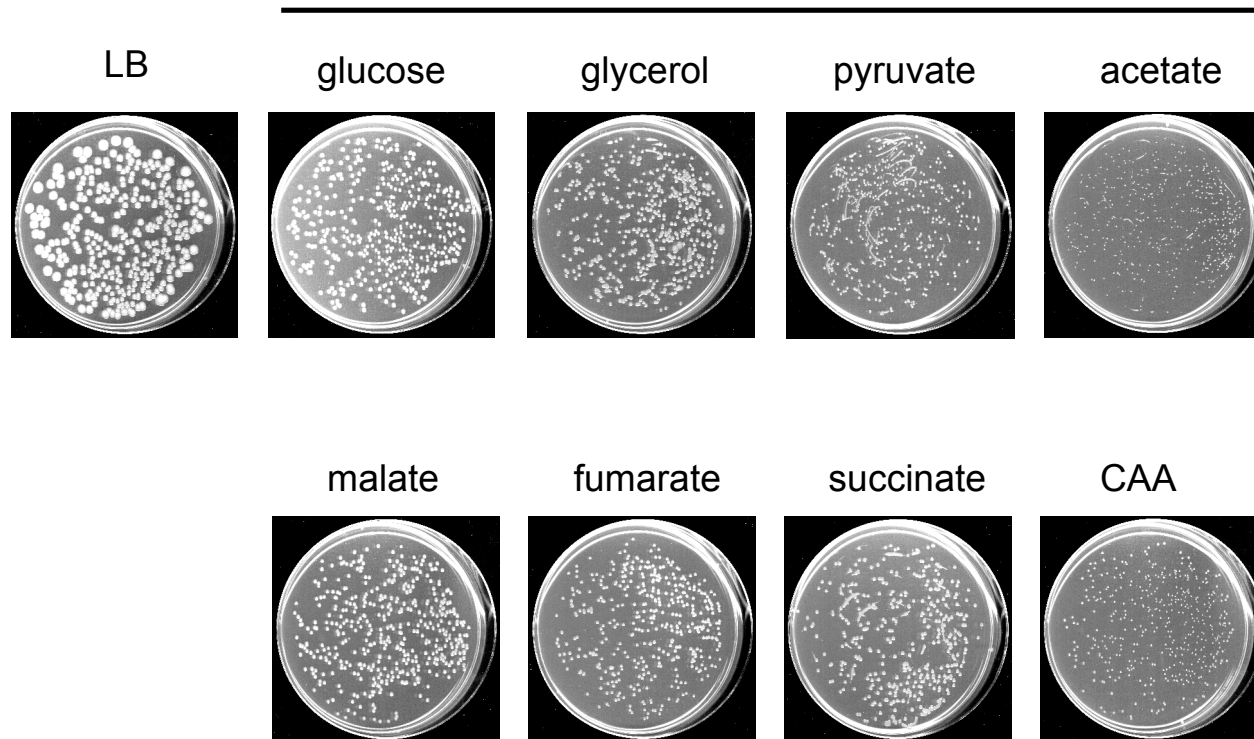

FIG S3

MT2115(pACYC177)

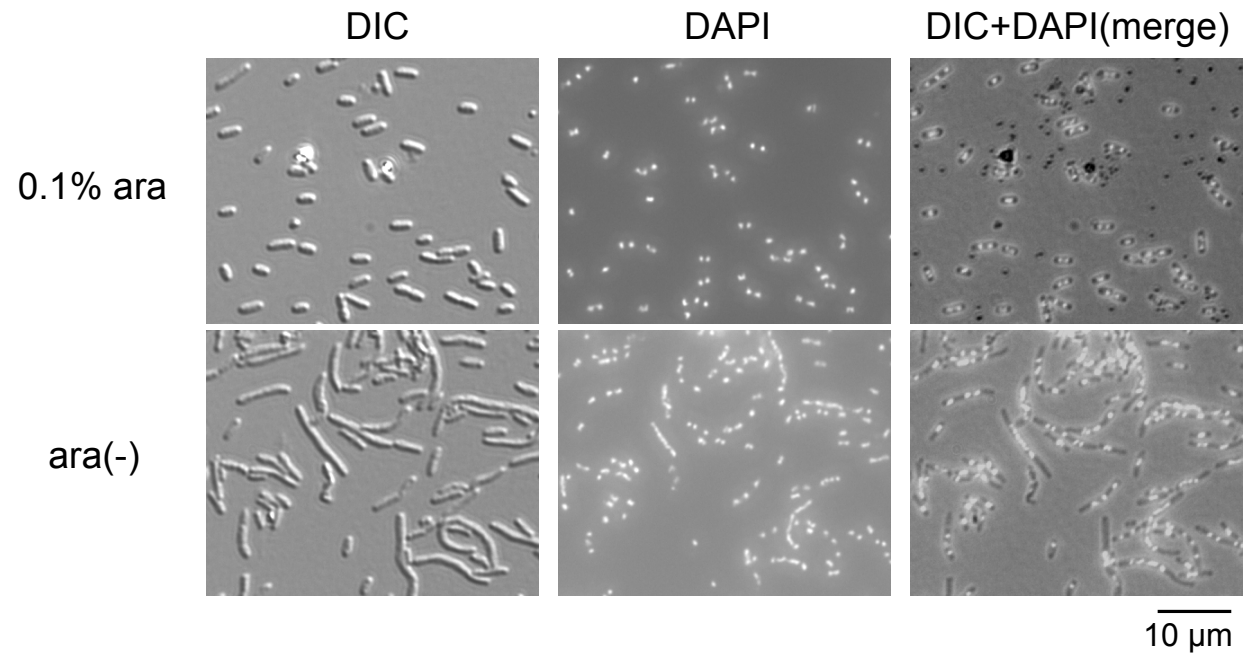

MT2116(pMT177Z)

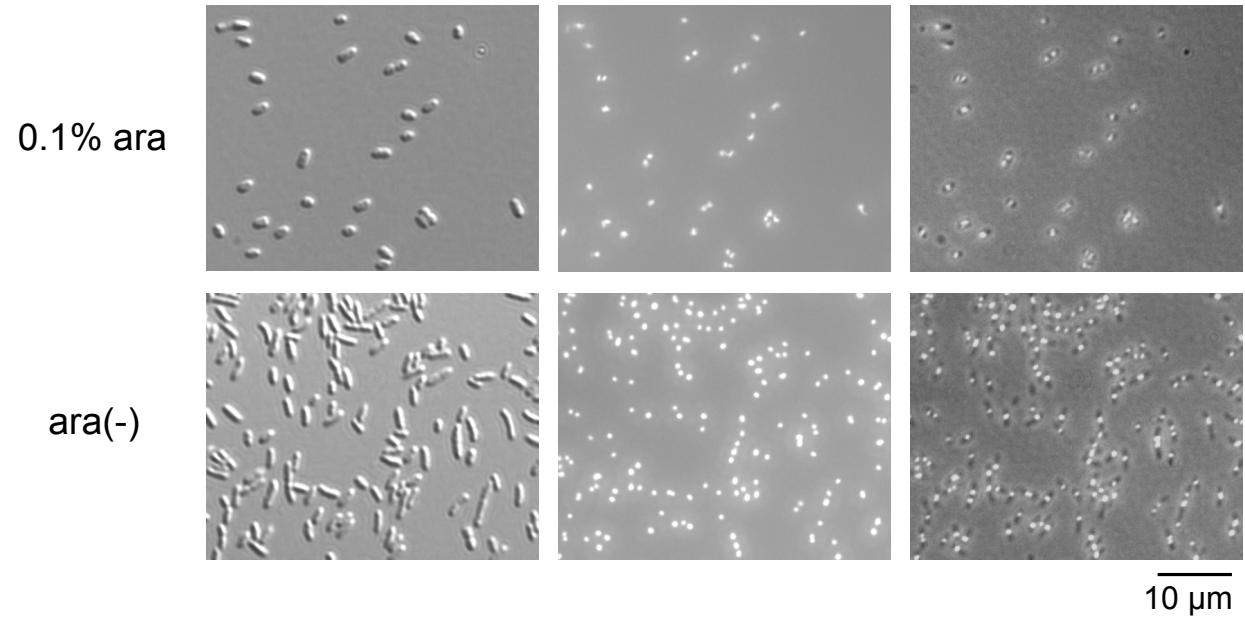

**FIG S1** Growth difference between N3433 and MG1655 on M9 minimal medium. N3433 and MG1655 were grown and plated onto LB, M9-glucose, M9-pyruvate, or M9-succinate. The plates were incubated at 37°C for two days and scanned.

**FIG S2** Growth of *deaD* mutant *E. coli* strain on variety of carbon sources. MG165D cultured in liquid made was spread on LB and M9 plates as indicated. Plates were scanned after an incubation period of two days at 37°C.

**FIG S3** Effect of adventitious expression of *ftsZ* on cellular morphology of  $\Delta rne/deaD::Tn10$  mutant strain. Strain MT2113 was transformed with the pACYC177 or pMT177Z plasmid. Slides were prepared as described previously (1). Cells were stained with ProLong Gold antifade reagent (Invitrogen) and microscopy images were taken as differential interference contrast (DIC), DAPI filter, and merged.

## REFERENCES

1. **Tamura, M., K. Lee, C. A. Miller, C. J. Moore, Y. Shirako, M. Kobayashi, and S. N. Cohen.** 2006. RNase E maintenance of proper FtsZ/FtsA ratio required for nonfilamentous growth of *Escherichia coli* cells but not for colony-forming ability. *J. Bacteriol.* **188**:5145-52.
